# Supplementary material for: Determinants of trends in neonatal, post-neonatal, infant, child and under-five mortalities in Tanzania from 2004 to 2016
Source: PubMed Central journal article supplement (PMC6734430; doi:10.1186/s12889-019-7547-x), 2019-09-09
Supplement: 12889_2019_7547_MOESM1_ESM.pdf [file 12889_2019_7547_MOESM1_ESM.pdf]

**Supplementary table 1: Model for neonatal mortality**

| <b>Variables</b>                                         | <b>Stage 1</b> | <b>Stage 2</b> | <b>Stage 3</b> | <b>Stage 4</b> |
|----------------------------------------------------------|----------------|----------------|----------------|----------------|
| <i>Community level factor</i>                            | HR (95%CI)     | HR (95%CI)     | HR (95%CI)     | HR (95%CI)     |
| <b>Year of survey*</b>                                   |                |                |                |                |
| 2004-2005                                                | <i>Ref</i>     | <i>Ref</i>     | <i>Ref</i>     | <i>Ref</i>     |
| 2010                                                     | 0.8292399      | 0.7891305      | 0.7836536      | 0.7907491      |
| 2015-2016                                                | 0.7781147      | 0.7099597*     | 0.755126*      | 0.7488134*     |
| <b>Residence type</b>                                    |                |                |                |                |
| Urban                                                    | <i>Ref</i>     | <i>Ref</i>     |                |                |
| Rural                                                    | 0.5945386*     | 0.6625102*     | 0.6256033*     | 0.6131622*     |
| <i>Socioeconomic level factor</i>                        |                |                |                |                |
| <b>Household wealth index</b>                            |                |                |                |                |
| Rich                                                     |                | <i>Ref</i>     |                |                |
| Middle                                                   |                | 1.231725       |                |                |
| Poor                                                     |                | 1.275143       |                |                |
| <b>Mother's education</b>                                |                |                |                |                |
| Secondary or higher                                      |                | <i>Ref</i>     | <i>Ref</i>     | <i>Ref</i>     |
| Primary                                                  |                | 0.9216009      | 0.8858988      | 1.018619       |
| No education                                             |                | 0.6229615*     | 0.6339145*     | 0.7231685      |
| <b>Mother's working status</b>                           |                |                |                |                |
| Working                                                  |                | <i>Ref</i>     |                |                |
| Not working                                              |                | 0.810773       |                |                |
| <b>Father's education</b>                                |                |                |                |                |
| Secondary or higher                                      |                | <i>Ref</i>     |                |                |
| Primary                                                  |                | 0.7597502      |                |                |
| No education                                             |                | 0.81459        |                |                |
| <i>Individual level factor</i>                           |                |                |                |                |
| <b>Mother's age (Years)</b>                              |                |                |                |                |
| 30—39                                                    |                |                | <i>Ref</i>     | <i>Ref</i>     |
| < 20                                                     |                |                | 3.346451*      | 3.296308*      |
| 20—29                                                    |                |                | 0.968163       | 0.9741225      |
| 40—49                                                    |                |                | 0.7684305      | 0.759587       |
| <b>Mother's body mass index (MBMI, kg/m<sup>2</sup>)</b> |                |                |                |                |
| MBMI > 18.5                                              |                |                | <i>Ref</i>     |                |
| MBMI ≤ 18,5                                              |                |                | 1.028026       |                |
| <b>Wanted pregnancy at the time</b>                      |                |                |                |                |
| Wanted then                                              |                |                | <i>Ref</i>     |                |
| Wanted later                                             |                |                | 0.8778982      |                |
| No more                                                  |                |                | 1.225904       |                |
| <b>Birth rank and birth interval</b>                     |                |                |                |                |
| 2nd or 3rd child, interval > 2                           |                |                | <i>Ref</i>     | <i>Ref</i>     |
| First child                                              |                |                | 1.456173*      | 1.44753*       |
| 2nd or 3rd child, interval ≤ 2                           |                |                | 1.488027*      | 1.416315       |

|                                              |            |            |
|----------------------------------------------|------------|------------|
| 4th or more child, interval > 2              | 1.077369   | 1.081848   |
| 4th or more child, interval ≤ 2              | 1.945828*  | 1.905949*  |
| <b>Sex</b>                                   |            |            |
| Female                                       | <i>Ref</i> | <i>Ref</i> |
| Male                                         | 1.614066*  | 1.590322*  |
| <b>Mother's perceived baby size at birth</b> |            |            |
| Average or larger                            | <i>Ref</i> | <i>Ref</i> |
| Small or very small                          | 2.798389*  | 2.725938*  |
| <i>Healthcare services</i>                   |            |            |
| <b>Delivery assistance</b>                   |            |            |
| Health professional                          |            | <i>Ref</i> |
| Non-health professional                      |            | 1.189167   |
| <b>Mode of delivery</b>                      |            |            |
| Non-caesarean                                |            | <i>Ref</i> |
| Caesarean section                            |            | 1.935259*  |
| <b>Place of delivery</b>                     |            |            |
| Health facility                              |            | <i>Ref</i> |
| Home                                         |            | 0.7522289  |

Notes: \*, Year of survey was included in all the models irrespective of its significance level; Stage 1- Independent variables (year of survey & community level factor); Stage 2- significant variable(s) in Stage 1 plus socioeconomic variables (maternal education, paternal education, mothers work status & household wealth status); Stage 3 – significant variable(s) in Stage 2 plus individual level factor for maternal and child (mothers age, MBMI, mother's desire for pregnancy, child sex, baby size at birth, & birth order/interval); Stage 4 – significant variables in Stage 3 plus health service factor (delivery assistant, mode of delivery & place of delivery). HR (95%CI): Hazard ratio with corresponding 95% confidence interval

**Supplementary table 2: Model for post-neonatal mortality**

| <b>Variables</b>                                         | <b>Stage 1</b> | <b>Stage 2</b> | <b>Stage 3</b> | <b>Stage 4</b> |
|----------------------------------------------------------|----------------|----------------|----------------|----------------|
| <i>Community level factor</i>                            | HR (95%CI)     | HR (95%CI)     | HR (95%CI)     | HR (95%CI)     |
| <b>Year of survey*</b>                                   |                |                |                |                |
| 2004-2005                                                | <i>Ref</i>     | <i>Ref</i>     | <i>Ref</i>     | <i>Ref</i>     |
| 2010                                                     | 0.6827234*     | 0.6901141*     | 0.6640418*     | 0.6586851*     |
| 2015-2016                                                | 0.4751844*     | 0.4668802*     | 0.4590798*     | 0.454784*      |
| <b>Residence type</b>                                    |                |                |                |                |
| Urban                                                    | <i>Ref</i>     |                |                |                |
| Rural                                                    | 1.184483       |                |                |                |
| Socioeconomic level factor                               |                |                |                |                |
| <b>Household wealth index</b>                            |                |                |                |                |
| Rich                                                     |                | <i>Ref</i>     |                |                |
| Middle                                                   |                | 0.9528148      |                |                |
| Poor                                                     |                | 0.9844441      |                |                |
| <b>Mother's education</b>                                |                |                |                |                |
| Secondary or higher                                      |                | <i>Ref</i>     |                |                |
| Primary                                                  |                | 1.240005       |                |                |
| No education                                             |                | 1.36806        |                |                |
| <b>Mother's working status</b>                           |                |                |                |                |
| Working                                                  |                | <i>Ref</i>     |                |                |
| Not working                                              |                | 1.183952       |                |                |
| <b>Father's education</b>                                |                |                |                |                |
| Secondary or higher                                      |                | <i>Ref</i>     | <i>Ref</i>     | <i>Ref</i>     |
| Primary                                                  |                | 1.092622       | 1.073352       | 1.122373       |
| No education                                             |                | 1.46924*       | 1.436054*      | 1.556047*      |
| <i>Individual level factor</i>                           |                |                |                |                |
| <b>Mother's age (Years)</b>                              |                |                |                |                |
| 30—39                                                    |                |                | <i>Ref</i>     | <i>Ref</i>     |
| < 20                                                     |                |                | 6.228211*      | 6.510216*      |
| 20—29                                                    |                |                | 1.816578*      | 1.963145*      |
| 40—49                                                    |                |                | 1.0038         | 1.028819       |
| <b>Mother's body mass index (MBMI, kg/m<sup>2</sup>)</b> |                |                |                |                |
| MBMI > 18.5                                              |                |                | <i>Ref</i>     |                |
| MBMI ≤ 18,5                                              |                |                | 0.9182471      |                |
| <b>Wanted pregnancy at the time</b>                      |                |                |                |                |
| Wanted then                                              |                |                | <i>Ref</i>     |                |
| Wanted later                                             |                |                | 0.6615135      |                |
| No more                                                  |                |                | 1.324899       |                |
| <b>Birth rank and birth interval</b>                     |                |                |                |                |
| 2nd or 3rd child, interval > 2                           |                |                | <i>Ref</i>     | <i>Ref</i>     |
| First child                                              |                |                | 0.8223472      | 0.8232425      |
| 2nd or 3rd child, interval ≤ 2                           |                |                | 1.288085       | 1.124177       |
| 4th or more child, interval > 2                          |                |                | 1.538788*      | 1.671436*      |
| 4th or more child, interval ≤ 2                          |                |                | 1.872942*      | 1.977023*      |
| <b>Sex</b>                                               |                |                |                |                |

|                                              |            |            |
|----------------------------------------------|------------|------------|
| Female                                       | <i>Ref</i> |            |
| Male                                         | 0.9694235  |            |
| <b>Mother's perceived baby size at birth</b> |            |            |
| Average or larger                            | <i>Ref</i> | <i>Ref</i> |
| Small or very small                          | 1.471389*  | 1.452677*  |
| <i>Healthcare services</i>                   |            |            |
| <b>Delivery assistance</b>                   |            |            |
| Health professional                          |            | <i>Ref</i> |
| Non-health professional                      |            | 1.657962   |
| <b>Mode of delivery</b>                      |            |            |
| Non-caesarean                                |            | <i>Ref</i> |
| Caesarean section                            |            | 1.829793*  |
| <b>Place of delivery</b>                     |            |            |
| Health facility                              |            | <i>Ref</i> |
| Home                                         |            | 0.9486266  |

Notes: \*; Year of survey was included in all the models irrespective of its significance level; Stage 1- Independent variables (year of survey & community level factor); Stage 2- significant variable(s) in Stage 1 plus socioeconomic variables (maternal education, paternal education, mothers work status & household wealth status); Stage 3 – significant variable(s) in Stage 2 plus individual level factor for maternal and child (mothers age, MBMI, mother's desire for pregnancy, child sex, baby size at birth, & birth order/interval); Stage 4 – significant variables in Stage 3 plus health service factor (delivery assistant, mode of delivery & place of delivery). HR (95%CI): Hazard ratio with corresponding 95% confidence interval

**Supplementary table 3: Model for infant mortality**

| <b>Variables</b>                              | <b>Stage 1</b> | <b>Stage 2</b> | <b>Stage 3</b> | <b>Stage 4</b> |
|-----------------------------------------------|----------------|----------------|----------------|----------------|
| <i>Community level factor</i>                 | HR (95%CI)     | HR (95%CI)     | HR (95%CI)     | HR (95%CI)     |
| <b>Year of survey*</b>                        |                |                |                |                |
| 2004-2005                                     | <i>Ref</i>     | <i>Ref</i>     | <i>Ref</i>     | <i>Ref</i>     |
| 2010                                          | 0.7508689*     | 0.7360093*     | 0.7148601*     | 0.7077062*     |
| 2015-2016                                     | 0.6187352*     | 0.585274*      | 0.6219872*     | 0.6055761*     |
| <b>Residence type</b>                         |                |                |                |                |
| Urban                                         | <i>Ref</i>     | <i>Ref</i>     | <i>Ref</i>     | <i>Ref</i>     |
| Rural                                         | 0.8002898*     | 0.8779659*     | 0.7792129*     | 0.7974976*     |
| Socioeconomic level factor                    |                |                |                |                |
| <b>Household wealth index</b>                 |                |                |                |                |
| Rich                                          |                | <i>Ref</i>     |                |                |
| Middle                                        |                | 1.036619       |                |                |
| Poor                                          |                | 1.054404       |                |                |
| <b>Mother's education</b>                     |                |                |                |                |
| Secondary or higher                           |                | <i>Ref</i>     |                |                |
| Primary                                       |                | 1.018095       |                |                |
| No education                                  |                | 0.9006739      |                |                |
| <b>Mother's working status</b>                |                |                |                |                |
| Working                                       |                | <i>Ref</i>     |                |                |
| Not working                                   |                | 0.9485328      |                |                |
| <b>Father's education</b>                     |                |                |                |                |
| Secondary or higher                           |                | <i>Ref</i>     | <i>Ref</i>     |                |
| Primary                                       |                | 0.8655531      | 1.073352       | 1.122373       |
| No education                                  |                | 1.051592       | 1.436054*      | 1.556047*      |
| <i>Individual level factor</i>                |                |                |                |                |
| <b>Mother's age (Years)</b>                   |                |                |                |                |
| 30—39                                         |                |                | <i>Ref</i>     | <i>Ref</i>     |
| < 20                                          |                |                | 4.24574*       | 4.466673*      |
| 20—29                                         |                |                | 1.269822       | 1.340346*      |
| 40—49                                         |                |                | 0.8937569      | 0.9026748      |
| <b>Mother's body mass index (MBMI, kg/m2)</b> |                |                |                |                |
| MBMI > 18.5                                   |                |                | <i>Ref</i>     |                |
| MBMI ≤ 18,5                                   |                |                | 0.9827271      |                |
| <b>Wanted pregnancy at the time</b>           |                |                |                |                |
| Wanted then                                   |                |                | <i>Ref</i>     |                |
| Wanted later                                  |                |                | 0.8090744      |                |
| No more                                       |                |                | 1.211723       |                |
| <b>Birth rank and birth interval</b>          |                |                |                |                |
| 2nd or 3rd child, interval > 2                |                |                | <i>Ref</i>     | <i>Ref</i>     |
| First child                                   |                |                | 1.125677       | 1.09573        |
| 2nd or 3rd child, interval ≤ 2                |                |                | 1.335934*      | 1.22894        |
| 4th or more child, interval > 2               |                |                | 1.216487       | 1.294069       |
| 4th or more child, interval ≤ 2               |                |                | 1.730086*      | 1.802716*      |
| <b>Sex</b>                                    |                |                |                |                |

|                                              |            |            |
|----------------------------------------------|------------|------------|
| Female                                       | <i>Ref</i> | <i>Ref</i> |
| Male                                         | 1.235023*  | 1.21983*   |
| <b>Mother's perceived baby size at birth</b> |            |            |
| Average or larger                            | <i>Ref</i> | <i>Ref</i> |
| Small or very small                          | 2.021688*  | 2.000901*  |
| <i>Healthcare services</i>                   |            |            |
| <b>Delivery assistance</b>                   |            |            |
| Health professional                          |            | <i>Ref</i> |
| Non-health professional                      |            | 1.246857   |
| <b>Mode of delivery</b>                      |            |            |
| Non-caesarean                                |            | <i>Ref</i> |
| Caesarean section                            |            | 1.861039*  |
| <b>Place of delivery</b>                     |            |            |
| Health facility                              |            | <i>Ref</i> |
| Home                                         |            | 0.8777461  |

Notes: \*; Year of survey was included in all the models irrespective of its significance level; Stage 1- Independent variables (year of survey & community level factor); Stage 2- significant variable(s) in Stage 1 plus socioeconomic variables (maternal education, paternal education, mothers work status & household wealth status); Stage 3 – significant variable(s) in Stage 2 plus individual level factor for maternal and child (mothers age, MBMI, mother's desire for pregnancy, child sex, baby size at birth, & birth order/interval); Stage 4 – significant variables in Stage 3 plus health service factor (delivery assistant, mode of delivery & place of delivery). HR (95%CI): Hazard ratio with corresponding 95% confidence interval

**Supplementary table 4: Model for child mortality**

| <b>Variables</b>                                         | <b>Stage 1</b> | <b>Stage 2</b> | <b>Stage 3</b> | <b>Stage 4</b> |
|----------------------------------------------------------|----------------|----------------|----------------|----------------|
| <i>Community level factor</i>                            | HR (95%CI)     | HR (95%CI)     | HR (95%CI)     | HR (95%CI)     |
| <b>Year of survey*</b>                                   |                |                |                |                |
| 2004-2005                                                | <i>Ref</i>     | <i>Ref</i>     | <i>Ref</i>     | <i>Ref</i>     |
| 2010                                                     | 0.5767911*     | 0.5504255*     | 0.5661412*     | 0.5739472*     |
| 2015-2016                                                | 0.4874735*     | 0.4391464*     | 0.484458*      | 0.4982022*     |
| <b>Residence type</b>                                    |                |                |                |                |
| Urban                                                    | <i>Ref</i>     | <i>Ref</i>     | <i>Ref</i>     | <i>Ref</i>     |
| Rural                                                    | 0.8714645*     | 0.6216056*     | 0.5363797*     | 0.5518565*     |
| <i>Socioeconomic level factor</i>                        |                |                |                |                |
| <b>Household wealth index</b>                            |                |                |                |                |
| Rich                                                     |                | <i>Ref</i>     | <i>Ref</i>     | <i>Ref</i>     |
| Middle                                                   |                | 1.97749*       | 2.042766*      | 2.026421*      |
| Poor                                                     |                | 2.075108*      | 2.170546*      | 2.182932*      |
| <b>Mother's education</b>                                |                |                |                |                |
| Secondary or higher                                      |                | <i>Ref</i>     | <i>Ref</i>     | <i>Ref</i>     |
| Primary                                                  |                | 4.224836*      | 2.43269*       | 2.472079*      |
| No education                                             |                | 4.697548*      | 2.57401*       | 2.678746*      |
| <b>Mother's working status</b>                           |                |                |                |                |
| Working                                                  |                | <i>Ref</i>     |                |                |
| Not working                                              |                | 0.9053102      |                |                |
| <b>Father's education</b>                                |                |                |                |                |
| Secondary or higher                                      |                | <i>Ref</i>     |                | <i>Ref</i>     |
| Primary                                                  |                | 1.313482       |                | 1.122373       |
| No education                                             |                | 0.9971735      |                | 1.556047*      |
| <i>Individual level factor</i>                           |                |                |                |                |
| <b>Mother's age (Years)</b>                              |                |                |                |                |
| 30—39                                                    |                |                | <i>Ref</i>     | <i>Ref</i>     |
| < 20                                                     |                |                | 1.647962       | 4.466673*      |
| 20—29                                                    |                |                | 1.077591       | 1.340346*      |
| 40—49                                                    |                |                | 1.093788       | 0.9026748      |
| <b>Mother's body mass index (MBMI, kg/m<sup>2</sup>)</b> |                |                |                |                |
| MBMI > 18.5                                              |                |                | <i>Ref</i>     |                |
| MBMI ≤ 18,5                                              |                |                | 1.066664       |                |
| <b>Wanted pregnancy at the time</b>                      |                |                |                |                |
| Wanted then                                              |                |                | <i>Ref</i>     |                |
| Wanted later                                             |                |                | 1.110838       |                |
| No more                                                  |                |                | 0.6084769      |                |
| <b>Birth rank and birth interval</b>                     |                |                |                |                |
| 2nd or 3rd child, interval > 2                           |                |                | <i>Ref</i>     | <i>Ref</i>     |
| First child                                              |                |                | 1.039231       | 1.09573        |
| 2nd or 3rd child, interval ≤ 2                           |                |                | 1.162415       | 1.22894        |
| 4th or more child, interval > 2                          |                |                | 1.071771       | 1.294069       |
| 4th or more child, interval ≤ 2                          |                |                | 1.194629       | 1.802716*      |
| <b>Sex</b>                                               |                |                |                |                |

|                                              |            |            |
|----------------------------------------------|------------|------------|
| Female                                       | <i>Ref</i> | <i>Ref</i> |
| Male                                         | 1.132236   | 1.21983*   |
| <b>Mother's perceived baby size at birth</b> |            |            |
| Average or larger                            | <i>Ref</i> | <i>Ref</i> |
| Small or very small                          | 1.426828   | 2.000901*  |
| <i>Healthcare services</i>                   |            |            |
| <b>Delivery assistance</b>                   |            |            |
| Health professional                          |            | <i>Ref</i> |
| Non-health professional                      |            | 0.8520181  |
| <b>Mode of delivery</b>                      |            |            |
| Non-caesarean                                |            | <i>Ref</i> |
| Caesarean section                            |            | 0.2659233  |
| <b>Place of delivery</b>                     |            |            |
| Health facility                              |            | <i>Ref</i> |
| Home                                         |            | 1.193779   |

Notes: \*; Year of survey was included in all the models irrespective of its significance level; Stage 1- Independent variables (year of survey & community level factor); Stage 2- significant variable(s) in Stage 1 plus socioeconomic variables (maternal education, paternal education, mothers work status & household wealth status); Stage 3 – significant variable(s) in Stage 2 plus individual level factor for maternal and child (mothers age, MBMI, mother's desire for pregnancy, child sex, baby size at birth, & birth order/interval); Stage 4 – significant variables in Stage 3 plus health service factor (delivery assistant, mode of delivery & place of delivery). HR (95%CI): Hazard ratio with corresponding 95% confidence interval



**Supplementary table 5: Model for under-5 mortality**

| <b>Variables</b>                              | <b>Stage 1</b> | <b>Stage 2</b> | <b>Stage 3</b> | <b>Stage 4</b> |
|-----------------------------------------------|----------------|----------------|----------------|----------------|
| <i>Community level factor</i>                 | HR (95%CI)     | HR (95%CI)     | HR (95%CI)     | HR (95%CI)     |
| <b>Year of survey*</b>                        |                |                |                |                |
| 2004-2005                                     | <i>Ref</i>     | <i>Ref</i>     | <i>Ref</i>     | <i>Ref</i>     |
| 2010                                          | 0.7066792*     | 0.6879827*     | 0.681689*      | 0.6867292*     |
| 2015-2016                                     | 0.5808406*     | 0.5491945*     | 0.5925562*     | 0.5988556*     |
| <b>Residence type</b>                         |                |                |                |                |
| Urban                                         | <i>Ref</i>     | <i>Ref</i>     | <i>Ref</i>     | <i>Ref</i>     |
| Rural                                         | 0.8354777*     | 0.8012982*     | 0.7919333*     | 0.7889419*     |
| Socioeconomic level factor                    |                |                |                |                |
| <b>Household wealth index</b>                 |                |                |                |                |
| Rich                                          |                | <i>Ref</i>     |                |                |
| Middle                                        |                | 1.21873        |                |                |
| Poor                                          |                | 1.225496       |                |                |
| <b>Mother's education</b>                     |                |                |                |                |
| Secondary or higher                           |                | <i>Ref</i>     | <i>Ref</i>     | <i>Ref</i>     |
| Primary                                       |                | 1.31015*       | 1.405698*      | 1.379892*      |
| No education                                  |                | 1.265346       | 1.340043*      | 1.320781*      |
| <b>Mother's working status</b>                |                |                |                |                |
| Working                                       |                | <i>Ref</i>     |                |                |
| Not working                                   |                | 1.008972       |                |                |
| <b>Father's education</b>                     |                |                |                |                |
| Secondary or higher                           |                | <i>Ref</i>     |                |                |
| Primary                                       |                | 0.9200016      |                |                |
| No education                                  |                | 0.9845557      |                |                |
| <i>Individual level factor</i>                |                |                |                |                |
| <b>Mother's age (Years)</b>                   |                |                |                |                |
| 30—39                                         |                |                | <i>Ref</i>     |                |
| < 20                                          |                |                | 1.150051       |                |
| 20—29                                         |                |                | 0.9601819      |                |
| 40—49                                         |                |                | 1.152517       |                |
| <b>Mother's body mass index (MBMI, kg/m2)</b> |                |                |                |                |
| MBMI > 18.5                                   |                |                | <i>Ref</i>     |                |
| MBMI ≤ 18,5                                   |                |                | 0.9719731      |                |
| <b>Wanted pregnancy at the time</b>           |                |                |                |                |
| Wanted then                                   |                |                | <i>Ref</i>     | <i>Ref</i>     |
| Wanted later                                  |                |                | 0.7698705*     | 0.7779449*     |
| No more                                       |                |                | 0.862667       | 0.8932415      |
| <b>Birth rank and birth interval</b>          |                |                |                |                |
| 2nd or 3rd child, interval > 2                |                |                | <i>Ref</i>     | <i>Ref</i>     |
| First child                                   |                |                | 1.365543*      | 1.385969*      |
| 2nd or 3rd child, interval ≤ 2                |                |                | 1.453296*      | 1.427004*      |
| 4th or more child, interval > 2               |                |                | 0.9915921      | 1.041766       |
| 4th or more child, interval ≤ 2               |                |                | 1.528529*      | 1.582744*      |
| <b>Sex</b>                                    |                |                |                |                |

|                                              |            |            |
|----------------------------------------------|------------|------------|
| Female                                       | <i>Ref</i> | <i>Ref</i> |
| Male                                         | 1.210508*  | 1.212475*  |
| <b>Mother's perceived baby size at birth</b> |            |            |
| Average or larger                            | <i>Ref</i> | <i>Ref</i> |
| Small or very small                          | 1.903953*  | 1.900566*  |
| <i>Healthcare services</i>                   |            |            |
| <b>Delivery assistance</b>                   |            |            |
| Health professional                          |            | <i>Ref</i> |
| Non-health professional                      |            | 1.187536   |
| <b>Mode of delivery</b>                      |            |            |
| Non-caesarean                                |            | <i>Ref</i> |
| Caesarean section                            |            | 1.465811   |
| <b>Place of delivery</b>                     |            |            |
| Health facility                              |            | <i>Ref</i> |
| Home                                         |            | 0.9977666  |

Notes: \*; Year of survey was included in all the models irrespective of its significance level; Stage 1- Independent variables (year of survey & community level factor); Stage 2- significant variable(s) in Stage 1 plus socioeconomic variables (maternal education, paternal education, mothers work status & household wealth status); Stage 3 – significant variable(s) in Stage 2 plus individual level factor for maternal and child (mothers age, MBMI, mother's desire for pregnancy, child sex, baby size at birth, & birth order/interval); Stage 4 – significant variables in Stage 3 plus health service factor (delivery assistant, mode of delivery & place of delivery). HR (95%CI): Hazard ratio with corresponding 95% confidence interval

**Supplementary table 6: Distribution of under-five mortality by study factors in Tanzania, 2004–2016 (n=1,585)**

| <b>Variable</b>                                          | <b>Neonatal<br/>n (%)</b> | <b>Post-neonatal<br/>n (%)</b> | <b>Infant<br/>n (%)</b> | <b>Child<br/>n (%)</b> | <b>Under-five<br/>n (%)</b> |
|----------------------------------------------------------|---------------------------|--------------------------------|-------------------------|------------------------|-----------------------------|
| <b>Year of survey</b>                                    |                           |                                |                         |                        |                             |
| 2004-2005                                                | 226 (36.6)                | 257 (45.6)                     | 483 (40.9)              | 187 (46.4)             | 670 (42.3)                  |
| 2010                                                     | 181 (29.3)                | 168 (29.8)                     | 349 (29.5)              | 106 (26.4)             | 455 (28.7)                  |
| 2015-2016                                                | 211 (34.2)                | 138 (24.6)                     | 350 (29.6)              | 110 (27.2)             | 460 (29.0)                  |
| <b>Residence type</b>                                    |                           |                                |                         |                        |                             |
| Urban                                                    | 195 (31.5)                | 104 (18.4)                     | 299 (25.3)              | 96 (23.9)              | 395 (24.9)                  |
| Rural                                                    | 424 (68.5)                | 459 (81.6)                     | 883 (74.7)              | 307 (76.1)             | 1190 (75.1)                 |
| <b>Household wealth index</b>                            |                           |                                |                         |                        |                             |
| Rich                                                     | 124 (20.1)                | 77 (13.6)                      | 201 (17.0)              | 41 (10.1)              | 242 (15.2)                  |
| Middle                                                   | 249 (40.2)                | 217 (38.6)                     | 466 (39.4)              | 172 (42.6)             | 638 (40.2)                  |
| Poor                                                     | 246 (39.7)                | 269 (47.8)                     | 515 (43.6)              | 191 (47.3)             | 706 (44.5)                  |
| <b>Mother's education</b>                                |                           |                                |                         |                        |                             |
| Secondary or higher                                      | 64 (10.4)                 | 27 (4.9)                       | 91 (7.8)                | 11 (2.6)               | 102 (6.5)                   |
| Primary                                                  | 439 (71.0)                | 375 (66.7)                     | 814 (69.0)              | 280 (69.2)             | 1094 (69.0)                 |
| No education                                             | 115 (18.6)                | 160 (28.4)                     | 275 (23.3)              | 114 (28.2)             | 389 (24.5)                  |
| <b>Mother's working status</b>                           |                           |                                |                         |                        |                             |
| Not-working                                              | 119 (20.4)                | 64 (11.9)                      | 183 (16.3)              | 56 (14.6)              | 239 (15.9)                  |
| Working                                                  | 465 (79.6)                | 476 (88.1)                     | 941 (83.7)              | 326 (85.4)             | 1267 (84.1)                 |
| <b>Mother's age (Years)</b>                              |                           |                                |                         |                        |                             |
| 30-39                                                    | 207 (33.5)                | 171 (30.3)                     | 378 (32.0)              | 132 (32.6)             | 510 (32.1)                  |
| < 20                                                     | 59 (9.5)                  | 28 (5.0)                       | 87 (7.3)                | 17 (4.3)               | 104 (6.6)                   |
| 20-29                                                    | 305 (49.2)                | 305 (54.3)                     | 610 (51.7)              | 214 (53.0)             | 824 (52.0)                  |
| 40-49                                                    | 48 (7.8)                  | 58 (10.4)                      | 106 (9.0)               | 41 (10.2)              | 147 (9.3)                   |
| <b>Mother's body mass index (MBMI, kg/m<sup>2</sup>)</b> |                           |                                |                         |                        |                             |
| MBMI > 18.5                                              | 570 (92.1)                | 518 (92.0)                     | 1088 (92.1)             | 370 (91.6)             | 1458 (92.0)                 |
| MBMI ≤ 18.5                                              | 45 (7.3)                  | 37 (6.6)                       | 82 (7.0)                | 32 (7.8)               | 114 (7.2)                   |
| <b>Wanted pregnancy at the time</b>                      |                           |                                |                         |                        |                             |
| Wanted then                                              | 462 (74.8)                | 447 (79.4)                     | 909 (77.0)              | 307 (76.0)             | 1216 (76.7)                 |
| Wanted later                                             | 116 (18.7)                | 75 (13.3)                      | 191 (16.1)              | 84 (20.7)              | 275 (17.3)                  |
| Unwanted                                                 | 27 (4.3)                  | 24 (4.3)                       | 51 (4.3)                | 10 (2.5)               | 61 (3.8)                    |
| <b>Father's education</b>                                |                           |                                |                         |                        |                             |
| Secondary or higher                                      | 80 (12.9)                 | 38 (6.7)                       | 118 (10.0)              | 20 (5.0)               | 138 (8.7)                   |
| Primary                                                  | 378 (61.0)                | 356 (63.4)                     | 734 (62.1)              | 296 (73.3)             | 1030 (65.0)                 |
| No education                                             | 79 (12.7)                 | 115 (20.4)                     | 194 (16.4)              | 55 (13.5)              | 249 (15.7)                  |
| <b>Birth rank and birth interval</b>                     |                           |                                |                         |                        |                             |
| 2 or 3 child, interval > 2                               | 133 (21.5)                | 142 (25.3)                     | 275 (23.3)              | 110 (27.2)             | 385 (42.3)                  |
| First child                                              | 212 (34.3)                | 129 (23.0)                     | 341 (28.9)              | 92 (22.7)              | 433 (27.3)                  |

|                                     |            |            |             |            |             |
|-------------------------------------|------------|------------|-------------|------------|-------------|
| 2 or 3 child, interval $\leq 2$     | 50 (8.1)   | 48 (8.5)   | 98 (8.3)    | 33 (8.1)   | 131 (8.2)   |
| 4 or more child, interval $> 2$     | 151 (24.3) | 178 (31.6) | 329 (27.8)  | 129 (32.1) | 458 (28.9)  |
| 4 or more child, interval $\leq 2$  | 73 (11.8)  | 66 (11.7)  | 139 (11.7)  | 40 (9.9)   | 179 (11.3)  |
| <b>Child sex</b>                    |            |            |             |            |             |
| Female                              | 236 (38.1) | 287 (51.1) | 523 (44.3)  | 186 (46.1) | 709 (44.7)  |
| Male                                | 383 (61.9) | 275 (48.9) | 658 (55.7)  | 218 (53.9) | 876 (55.3)  |
| <b>Mother's perceived baby size</b> |            |            |             |            |             |
| Average or larger                   | 460 (74.3) | 482 (85.7) | 942 (79.7)  | 350 (86.6) | 1292 (81.5) |
| Small or very small                 | 131 (21.2) | 61 (10.9)  | 192 (16.3)  | 47 (11.5)  | 239 (15.1)  |
| <b>Delivery assistance</b>          |            |            |             |            |             |
| Health professional                 | 209 (33.7) | 176 (31.3) | 385 (32.6)  | 127 (31.5) | 512 (32.3)  |
| Non-health professional             | 299 (48.4) | 286 (50.8) | 585 (49.5)  | 201 (49.8) | 786 (49.6)  |
| <b>Mode of delivery</b>             |            |            |             |            |             |
| Non-caesarean                       | 565 (91.4) | 532 (94.6) | 1097 (92.9) | 396 (98.1) | 1493 (94.2) |
| Caesarean section                   | 54 (8.6)   | 27 (4.8)   | 81 (6.8)    | 7 (1.8)    | 88 (5.5)    |
| <b>Place of delivery</b>            |            |            |             |            |             |
| Health facility                     | 146 (37.6) | 95 (25.4)  | 241 (31.6)  | 73 (26.3)  | 314 (30.2)  |
| Home                                | 228 (58.7) | 265 (70.9) | 493 (64.7)  | 201 (72.4) | 694 (66.8)  |

---

Notes: n (%), number (and percentage of deaths) across variables; (%), proportions did not sum up to 100% due to missing values; A non-health professional may be a traditional birth attendant who is often a woman, who assists the mother during childbirth and who initially acquired her skills by delivering babies herself or by working with other traditional birth attendants.
